# Supplementary material for: Outcome of Different Sequencing and Assembly Approaches on the Detection of Plasmids and Localization of Antimicrobial Resistance Genes in Commensal Escherichia coli
Source: MDPI journal article supplement (doi:10.3390/microorganisms9030598), 2021-03-14
Supplement: s1 [file s1]

## *Supplementary Material*

### **Supplement S1: Data evaluation**

For evaluation of the genome assemblies, the quality assessment tool QUAST 5.0.2 was used. Thereby, we determined the number of contigs in various sizes, the size of the largest contig, the N50, and the number of circular contigs. Further, assembled contigs were analysed with mlst [1]. Assembled contigs were analysed for their resistance genes and plasmid markers with abricate Version 1.0.1 [2]. Databases were provided by abricate and downloaded on 09.24.20. These were the PlasmidFinder database [3] as well as the NCBI [4, 5] resistance database. For concordance, a minimal identity (ID) of 80 % and a minimal coverage of 80 % for estimation of plasmid markers and resistance genes was used as threshold. When used in conjunction with the NCBI resistance database, abricate provides for each investigated isolate its associated resistance phenotype.

## Supplement S2: Accession Number

**Supplementary Table S1:** SRX-ID for different sequencing approaches within the Genbank BioProject ID PRJNA589028. SRS5635527 (17-AB00050), SRS5635528 (17-AB00090), SRS5635529 (17-AB00432), SRS5635530 (17-AB00587) and SRS5635526 (17-AB00639).

| Sample name and sequencing and assembly approach | SRX-ID     | SRR-ID      |
|--------------------------------------------------|------------|-------------|
| raw-reads MinION 17-AB00050                      | SRX9296037 | SRR12828403 |
| raw-reads MinION 17-AB00090                      | SRX9296038 | SRR12828402 |
| raw-reads MinION 17-AB00432                      | SRX9296039 | SRR12828401 |
| raw-reads MinION 17-AB00587                      | SRX9296040 | SRR12828400 |
| raw-reads MinION 17-AB00639                      | SRX9296041 | SRR12828399 |
| raw-reads PacBio 17-AB00050                      | SRX7222756 | SRR10538960 |
| raw-reads PacBio 17-AB00090                      | SRX7222757 | SRR10538959 |
| raw-reads PacBio 17-AB00432                      | SRX7222758 | SRR10538958 |
| raw-reads PacBio 17-AB00587                      | SRX7222759 | SRR10538957 |
| raw-reads PacBio 17-AB00639                      | SRX7222760 | SRR10538956 |
| Raw-reads Illumina NextSeq 17-AB00050            | SRX7214604 | SRR10530641 |
| Raw-reads Illumina NextSeq 17-AB00090            | SRX7214605 | SRR10530640 |
| Raw-reads Illumina NextSeq 17-AB00432            | SRX7214606 | SRR10530639 |
| Raw-reads Illumina NextSeq 17-AB00587            | SRX7214607 | SRR10530638 |
| Raw-reads Illumina NextSeq 17-AB00639            | SRX7214608 | SRR10530637 |

**Supplement S3:** (A) XbaI-PFGE profiles of *E. coli* isolates. S: *Salmonella* serovar Braenderup H9812, lane 1: 17-AB00050, lane 2: 17-AB00090, lane 3: 17-AB00432, lane 4: 17-AB00587 and lane 5: 17-AB00639. (B) S1-PFGE profile of the *E. coli* isolates and determination of the *qnrS1* gene location. S: *Salmonella* serovar Braenderup H9812, lane 1: 17-AB00050, lane 2: 17-AB00090, lane 3: 17-AB00432, lane 4: 17-AB00587 and lane 5: 17-AB00639. The location of the *qnrS1* was determined by DNA-DNA hybridization. Bands exhibiting positive hybridization signals using *qnrS1* as a probe are indicated by asterisks. (C) Results of the plasmid-profiling using CosMCprep “Mini prep of plasmids” kit (Beckman) extracted plasmid DNA on a 0.8 % agarose gel. S: DNA marker (1-10 kb) (Biozym, Oldendorf, Germany), lane 1: 17-AB00050, lane 2: 17-AB00090, lane 3: 17-AB00432, lane 4: 17-AB00587 and lane 5: 17-AB00639.

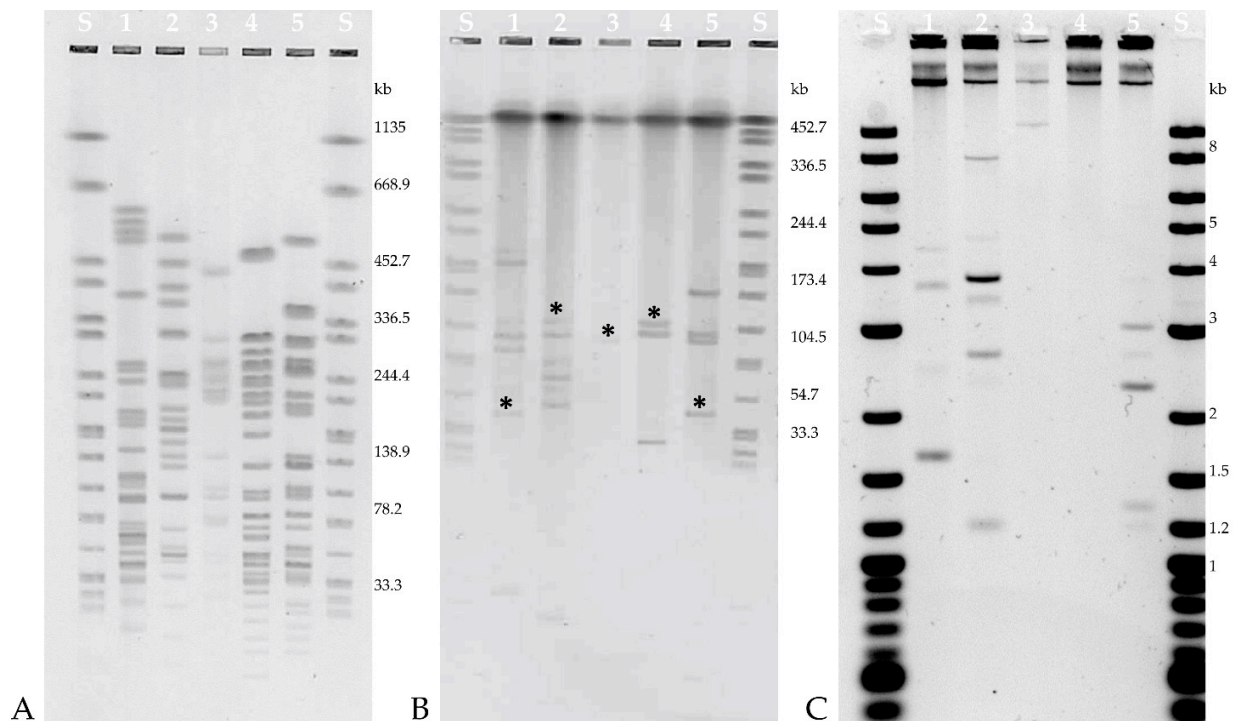

**Supplement S4:** Size, Inc group and respective resistance genes per closed plasmid detected through different sequencing and assembly approaches.

**17-AB00050**

| <b>S1-PFGE size (bp)</b> | <b>Unicycler-NextSeq</b> | <b>Flye-PacBio</b>                                    | <b>Flye-ONT</b>                                               | <b>Unicycler-PacBio/NextSeq</b>                               | <b>Unicycler-ONT/NextSeq</b>                          |
|--------------------------|--------------------------|-------------------------------------------------------|---------------------------------------------------------------|---------------------------------------------------------------|-------------------------------------------------------|
| <b>&lt; 20,000</b>       | 6,789<br>Col156<br>-     | 6,795<br>Col156<br>-                                  | 13,911<br>Col156, Col156<br>-                                 | 6,789<br>Col156<br>-                                          | 6,789<br>Col156<br>-                                  |
| <b>45,000</b>            | -<br>-<br>-              | 46,338<br>IncX3<br><i>qnrS1, bla<sub>SHV</sub>-12</i> | 46,207<br>IncX3<br><i>qnrS1, bla<sub>SHV</sub>-12</i>         | 46,338<br>IncX3<br><i>qnrS1, bla<sub>SHV</sub>-12</i>         | 46,338<br>IncX3<br><i>qnrS1, bla<sub>SHV</sub>-12</i> |
|                          | -<br>-<br>-              | -<br>-<br>-                                           | 62,702<br>p0111<br>-                                          | -<br>-<br>-                                                   | -<br>-<br>-                                           |
| <b>90,000</b>            | -<br>-<br>-              | -<br>-<br>-                                           | 93,200<br>-<br>-                                              | 93,318<br>-<br>-                                              | 93,318<br>-<br>-                                      |
| <b>100,000</b>           | -<br>-<br>-              | -<br>-<br>-                                           | 103,735<br>IncFIB(AP001918)<br><i>aadA1, aac(3)-Via, sul1</i> | 104,102<br>IncFIB(AP001918)<br><i>aadA1, aac(3)-Via, sul1</i> | -<br>-<br>-                                           |
| <b>174,000</b>           | -                        | -                                                     | -                                                             | -                                                             | -                                                     |

## 17-AB00090

| S1-PFGE size (bp) | Unicycler-NextSeq | Flye-PacBio                                | Flye-ONT                                   | Unicycler-PacBio/NextSeq                   | Unicycler-ONT/NextSeq                      |
|-------------------|-------------------|--------------------------------------------|--------------------------------------------|--------------------------------------------|--------------------------------------------|
| < 20,000          | 1,551             | -                                          | -                                          | 1,551                                      | 1,551                                      |
|                   | Col(MG828)        | -                                          | -                                          | Col(MG828)                                 | Col(MG828)                                 |
|                   | -                 | -                                          | -                                          | -                                          | -                                          |
|                   | 4,018             | -                                          | -                                          | 4,018                                      | 4,018                                      |
|                   | ColRNAI           | -                                          | -                                          | ColRNAI                                    | ColRNAI                                    |
|                   | -                 | -                                          | -                                          | -                                          | -                                          |
|                   | 5,873             | 5,873                                      | -                                          | 5,873                                      | 5,873                                      |
|                   | ColRNAI           | ColRNAI                                    | -                                          | ColRNAI                                    | ColRNAI                                    |
| 53,000            | -                 | 8,036                                      | 11,689                                     | -                                          | -                                          |
|                   | -                 | ColRNAI, ColRNAI                           | ColRNAI, ColRNAI                           | -                                          | -                                          |
|                   | -                 | -                                          | -                                          | -                                          | -                                          |
|                   | -                 | -                                          | -                                          | -                                          | -                                          |
| 65,000            | -                 | 71,840                                     | 71,683                                     | 71,850                                     | 71,850                                     |
|                   | -                 | IncFII(pHN7A8) pHN7A8                      | IncFII(pHN7A8) pHN7A8                      | IncFII(pHN7A8) pHN7A8                      | IncFII(pHN7A8) pHN7A8                      |
|                   | -                 | <i>bla</i> <sub>TEM-1</sub>                | <i>bla</i> <sub>TEM-1</sub>                | <i>bla</i> <sub>TEM-1</sub>                | <i>bla</i> <sub>TEM-1</sub>                |
| 100,000           | -                 | 107,341                                    | 107,104                                    | 107,350                                    | 107,350                                    |
|                   | -                 | IncI1_α                                    | IncI1_α                                    | IncI1_α                                    | IncI1_α                                    |
|                   | -                 | <i>bla</i> <sub>TEM-1</sub> , <i>qnrS1</i> |

## 17-AB00432

| S1-PFGE size (bp) | Unicycler-NextSeq | Flye-PacBio                                                                                                                     | Flye-ONT                                                                                                                        | Unicycler-PacBio/NextSeq                                                                                                        | Unicycler-ONT/NextSeq                                                                                                           |
|-------------------|-------------------|---------------------------------------------------------------------------------------------------------------------------------|---------------------------------------------------------------------------------------------------------------------------------|---------------------------------------------------------------------------------------------------------------------------------|---------------------------------------------------------------------------------------------------------------------------------|
|                   | -                 | -                                                                                                                               | 27,999                                                                                                                          | 13,842                                                                                                                          | 14,020                                                                                                                          |
|                   | -                 | -                                                                                                                               | IncR_1, IncR_1                                                                                                                  | IncR_1                                                                                                                          | IncR_1                                                                                                                          |
|                   | -                 | -                                                                                                                               | -                                                                                                                               | -                                                                                                                               | -                                                                                                                               |
| 95,000            | -                 | 103,978                                                                                                                         | 103,779                                                                                                                         | 103,789                                                                                                                         | 103,975                                                                                                                         |
|                   | -                 | IncY                                                                                                                            | IncY                                                                                                                            | IncY                                                                                                                            | IncY                                                                                                                            |
|                   | -                 | <i>tet(A), tet(A),<br/>dfrA14, sul2,<br/>aph(3'')-Ib,<br/>aph(6)-Id, bla<sub>TEM</sub>-1,<br/>bla<sub>CTX-M-15</sub>, qnrS1</i> | <i>tet(A), tet(A),<br/>dfrA14, sul2,<br/>aph(3'')-Ib,<br/>aph(6)-Id, bla<sub>TEM</sub>-1,<br/>bla<sub>CTX-M-15</sub>, qnrS1</i> | <i>tet(A), tet(A),<br/>dfrA14, sul2,<br/>aph(3'')-Ib, aph(6)-Id,<br/>bla<sub>TEM</sub>-1, bla<sub>CTX-M-15</sub>,<br/>qnrS1</i> | <i>tet(A), qnrS1,<br/>bla<sub>CTX-M-15</sub>,<br/>bla<sub>TEM</sub>-1, aph(6)-Id,<br/>aph(3'')-Ib, sul2,<br/>dfrA14, tet(A)</i> |

## 17-AB00587

| S1-PFGE size (bp) | Unicycler-NextSeq | Flye-PacBio                                                 | Flye-ONT                                                    | Unicycler-PacBio/NextSeq                                    | Unicycler-ONT/NextSeq                                       |
|-------------------|-------------------|-------------------------------------------------------------|-------------------------------------------------------------|-------------------------------------------------------------|-------------------------------------------------------------|
| 30,000            | -<br>-<br>-       | -<br>-<br>-                                                 | -<br>-<br>-                                                 | -<br>-<br>-                                                 | -<br>-<br>-                                                 |
| 100,000           | -<br>-<br>-       | 109,877<br>IncI1_α<br><i>qnrS1, aadA2, lnu(F)</i>           | 109,622<br>IncI1_α<br><i>qnrS1, aadA2, lnu(F)</i>           | 109,877<br>IncI1_α<br><i>qnrS1, aadA2, lnu(F)</i>           | 109,876<br>IncI1_α<br><i>qnrS1, aadA2, lnu(F)</i>           |
| 150,000           | -<br>-<br>-       | 119,064<br>IncFIB(pHCM2) pHCM2<br><i>blaCTX-M-1, mph(A)</i> | 118,872<br>IncFIB(pHCM2) pHCM2<br><i>blaCTX-M-1, mph(A)</i> | 119,064<br>IncFIB(pHCM2) pHCM2<br><i>blaCTX-M-1, mph(A)</i> | 119,064<br>IncFIB(pHCM2) pHCM2<br><i>blaCTX-M-1, mph(A)</i> |

## 17-AB00639

| S1-PFGE size (bp) | Unicycler-NextSeq | Flye-PacBio                                                                                                                  | Flye-ONT                                                                                                  | Unicycler-PacBio/NextSeq                                                                                                     | Unicycler-ONT/NextSeq                                                                                                        |
|-------------------|-------------------|------------------------------------------------------------------------------------------------------------------------------|-----------------------------------------------------------------------------------------------------------|------------------------------------------------------------------------------------------------------------------------------|------------------------------------------------------------------------------------------------------------------------------|
| < 20,000          | 1,552             | -                                                                                                                            | -                                                                                                         | 1,552                                                                                                                        | 1552                                                                                                                         |
|                   | Col(MG828)        | -                                                                                                                            | -                                                                                                         | Col(MG828)                                                                                                                   | Col(MG828)                                                                                                                   |
|                   | -                 | -                                                                                                                            | -                                                                                                         | -                                                                                                                            | -                                                                                                                            |
|                   | 1,748             | -                                                                                                                            | -                                                                                                         | 1,748                                                                                                                        | 1,748                                                                                                                        |
|                   | ColpVC            | -                                                                                                                            | -                                                                                                         | ColpVC                                                                                                                       | ColpVC                                                                                                                       |
|                   | -                 | -                                                                                                                            | -                                                                                                         | -                                                                                                                            | -                                                                                                                            |
|                   | -                 | -                                                                                                                            | 6,719                                                                                                     | -                                                                                                                            | 3,374                                                                                                                        |
|                   | -                 | -                                                                                                                            | -                                                                                                         | -                                                                                                                            | -                                                                                                                            |
|                   | -                 | -                                                                                                                            | -                                                                                                         | -                                                                                                                            | -                                                                                                                            |
|                   | -                 | -                                                                                                                            | 9,155                                                                                                     | -                                                                                                                            | 4,593                                                                                                                        |
| 45,000            | -                 | -                                                                                                                            | ColRNAI, ColRNAI                                                                                          | -                                                                                                                            | ColRNAI                                                                                                                      |
|                   | -                 | -                                                                                                                            | -                                                                                                         | -                                                                                                                            | -                                                                                                                            |
|                   | -                 | -                                                                                                                            | -                                                                                                         | -                                                                                                                            | -                                                                                                                            |
| 45,000            | -                 | 47,133                                                                                                                       | 46,996                                                                                                    | 47,132                                                                                                                       | 47,132                                                                                                                       |
|                   | -                 | IncX3, IncX1                                                                                                                 | IncX3, IncX1                                                                                              | IncX1                                                                                                                        | IncX1                                                                                                                        |
|                   | -                 | <i>qnrS1</i> , <i>bla</i> <sub>TEM-1</sub>                                                                                   | <i>qnrS1</i> , <i>bla</i> <sub>TEM-1</sub>                                                                | <i>qnrS1</i> , <i>bla</i> <sub>TEM-1</sub>                                                                                   | <i>qnrS1</i> , <i>bla</i> <sub>TEM-1</sub>                                                                                   |
| 95,000            | -                 | 105,628                                                                                                                      | 105,360                                                                                                   | 105,722                                                                                                                      | 105,776                                                                                                                      |
|                   | -                 | IncI1_α                                                                                                                      | IncI1_α                                                                                                   | IncI1_α                                                                                                                      | IncI1_α                                                                                                                      |
|                   | -                 | <i>aph</i> (6)-Id, <i>aph</i> (3'')-Ib, <i>aph</i> (4)-Ia, <i>aac</i> (3)-IVa, <i>mph</i> (A), <i>bla</i> <sub>CTX-M-1</sub> | <i>aph</i> (3'')-Ib, <i>aph</i> (4)-Ia, <i>aac</i> (3)-IVa, <i>mph</i> (A), <i>bla</i> <sub>CTX-M-1</sub> | <i>aph</i> (6)-Id, <i>aph</i> (3'')-Ib, <i>aph</i> (4)-Ia, <i>aac</i> (3)-IVa, <i>mph</i> (A), <i>bla</i> <sub>CTX-M-1</sub> | <i>aph</i> (6)-Id, <i>aph</i> (3'')-Ib, <i>aph</i> (4)-Ia, <i>aac</i> (3)-IVa, <i>mph</i> (A), <i>bla</i> <sub>CTX-M-1</sub> |
| 100,000           | -                 | -                                                                                                                            | -                                                                                                         | -                                                                                                                            | -                                                                                                                            |
|                   | -                 | -                                                                                                                            | -                                                                                                         | -                                                                                                                            | -                                                                                                                            |
|                   | -                 | -                                                                                                                            | -                                                                                                         | -                                                                                                                            | -                                                                                                                            |
| 140,000           | -                 | 150,391                                                                                                                      | 150,074                                                                                                   | 150,391                                                                                                                      | 150,391                                                                                                                      |
|                   | -                 | IncFII, IncFIB (AP001918)                                                                                                    | IncFII, IncFIB (AP001918)                                                                                 | IncFII, IncFIB (AP001918)                                                                                                    | IncFII, IncFIB (AP001918)                                                                                                    |
|                   | -                 | <i>sul2</i> , <i>aph</i> (3'')-Ib, <i>aph</i> (6)-Id, <i>dfrA5</i> , <i>bla</i> <sub>TEM-1</sub>                             | <i>sul2</i> , <i>aph</i> (3'')-Ib, <i>aph</i> (6)-Id, <i>dfrA5</i> , <i>bla</i> <sub>TEM-1</sub>          | <i>sul2</i> , <i>aph</i> (3'')-Ib, <i>aph</i> (6)-Id, <i>dfrA5</i> , <i>bla</i> <sub>TEM-1</sub>                             | <i>sul2</i> , <i>aph</i> (3'')-Ib, <i>aph</i> (6)-Id, <i>dfrA5</i> , <i>bla</i> <sub>TEM-1</sub>                             |



**Supplement S5:** Results of minimal inhibitory testing for tested *E. coli* isolates.

| Antibiotic | 17-AB000050 |    | 17-AB000090           |                 | 17-AB000432           |                 | 17-AB000587 |                 | 17-AB000639 |    |
|------------|-------------|----|-----------------------|-----------------|-----------------------|-----------------|-------------|-----------------|-------------|----|
| AMP        | >64         | NW | >64                   | NW              | >64                   | NW              | >64         | NW              | >64         | NW |
| AZI        | 4           | WT | 4                     | WT              | 8                     | WT              | ≤2 / 4/ 4   | WT / WT / WT    | 4           | WT |
| CEFEPI     | 0.5         | NW | 0.25 /<br>≤0.06/ 0.12 | NW / WT<br>/ WT | 32                    | NW              | 4/ 16/ 16   | WT / NW<br>/ NW | 32          | NW |
| CHL        | ≤8          | WT | ≤8                    | WT              | ≤8                    | WT              | ≤8          | WT              | ≤8          | WT |
| CIP        | 0.5         | NW | 8                     | NW              | >8                    | NW              | 0.25        | NW              | 0.25        | NW |
| COL        | ≤1          | WT | ≤1                    | WT              | ≤1                    | WT              | 2           | WT              | ≤1          | WT |
| ERTA       | ≤0.015      | WT | ≤0.015                | WT              | 0.03                  | WT              | ≤0.015      | WT              | ≤0.015      | WT |
| FOT        | 8           | NW | ≤0.25                 | WT              | >4                    | NW              | >4          | NW              | >64         | NW |
| FOX        | 8           | WT | 4                     | WT              | 4                     | WT              | 4           | WT              | 4           | WT |
| GEN        | 16          | NW | 1                     | WT              | ≤0.5                  | WT              | 1           | WT              | 32          | NW |
| IMIPE      | 0.25        | WT | 0.25                  | WT              | 0.25                  | WT              | 0.25        | WT              | 0.25        | WT |
| MERO       | ≤0.03       | WT | ≤0.03                 | WT              | ≤0.03                 | WT              | ≤0.03       | WT              | ≤0.03       | WT |
| NAL        | 8           | WT | >128                  | NW              | >128                  | NW              | 8           | WT              | 8           | WT |
| SMX        | >1024       | NW | ≤8                    | WT              | >1024                 | NW              | ≤8          | WT              | >1024       | NW |
| TAZ        | 16          | NW | ≤0.5                  | WT              | >8                    | NW              | 1           | NW              | 1           | NW |
| TET        | ≤2          | WT | >64                   | NW              | >64                   | NW              | ≤2          | WT              | ≤2          | WT |
| TGC        | ≤0.25       | WT | ≤0.25                 | WT              | ≤0.25 /<br>0.5/ ≤0.25 | WT / WT /<br>WT | ≤0.25       | WT              | ≤0.25       | WT |
| TMP        | ≤0.25       | WT | ≤0.25                 | WT              | >32                   | NW              | ≤0.25       | WT              | >32         | NW |

Isolates were tested in triplicate. Divergent outcomes are shown in triplicate. Minimal inhibitory concentrations were provided in mg/l. WT: wild-type, NW: non wild-type, represented in bold letters. Abbreviations: AMP: ampicillin, AZI: azithromycin, CEFEPi: cefepime, FOT: cefotaxime, FOX: ceftazidime, TAZ: ceftazidime, CHL: chloramphenicol, CIP: ciprofloxacin, COL: colistin, ERTA: ertapenem, GEN: gentamicin, IMiPE: imipenem, MERO: meropenem, NAL: nalidixic acid, SMX: sulfamethoxazole, TET: tetracycline, TGC: tigecycline, TMP: trimethoprim.

**Supplement S6:** Plasmid annotation of extrachromosomal elements carrying *qnrS1*. Sheet 1: pEC00050-17\_5, sheet 2: pEC00090-17\_2, sheet 3: pEC00432-17\_3, sheet 4: pEC00587-17\_1, sheet 5: pEC00639-17\_4.

**Supplement S7:** Genome assemblies of the different WGS approaches.

## References

1. Jolley, K.A. and M.C. Maiden, *BIGSdb: Scalable analysis of bacterial genome variation at the population level*. BMC Bioinformatics, 2010. **11**: p. 595.
2. Seemann, T., *abricate*. 2014: <https://github.com/tseemann/abricate>
3. Carattoli, A., et al., *In silico detection and typing of plasmids using PlasmidFinder and plasmid multilocus sequence typing*. Antimicrob Agents Chemother, 2014. **58**(7): p. 3895-903.
4. Coordinators, N.R., *Database resources of the National Center for Biotechnology Information*. Nucleic Acids Res, 2018. **46**(D1): p. D8-D13.
5. Feldgarden, M., et al., *Validating the AMRFinder Tool and Resistance Gene Database by Using Antimicrobial Resistance Genotype-Phenotype Correlations in a Collection of Isolates*. 2019.
